# Supplementary material for: Hsp90 Blockers Inhibit Adipocyte Differentiation and Fat Mass Accumulation
Source: PubMed Central journal article supplement (PMC3976389; doi:10.1371/journal.pone.0094127), 2014-04-04
Supplement: pone.0094127.s001.pdf [file pone.0094127.s001.pdf]

Figure S1

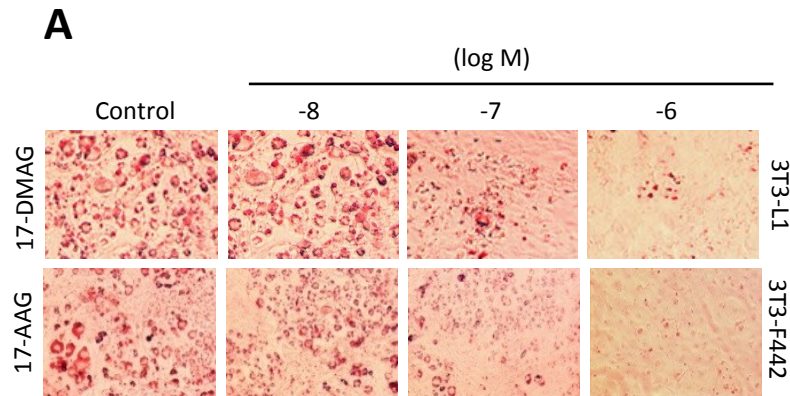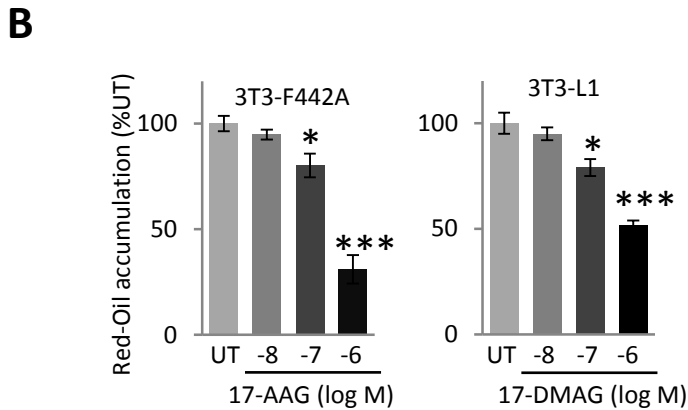

**Geldanamycin Analogues inhibit lipid accumulation in adipocytes.** (A) At confluence, 3T3-L1 or 3T3-F442A preadipocytes were induced to differentiation in presence of an increasing dose of 17-AAG or 17-DMAG for 10 days. Lipid accumulation was visualized under microscope after Oil-Red-O staining. (B) The lipid accumulation was quantified after extraction of the stained lipid and the absorbance measured at 520nm. Data are given as mean  $\pm$  SD (n=3), \*p<0.05, \*\*\*p<0.001
