# Supplementary material for: Hsp90 Blockers Inhibit Adipocyte Differentiation and Fat Mass Accumulation
Source: PubMed Central journal article supplement (PMC3976389; doi:10.1371/journal.pone.0094127), 2014-04-04
Supplement: pone.0094127.s002.pdf [file pone.0094127.s002.pdf]

Figure S2

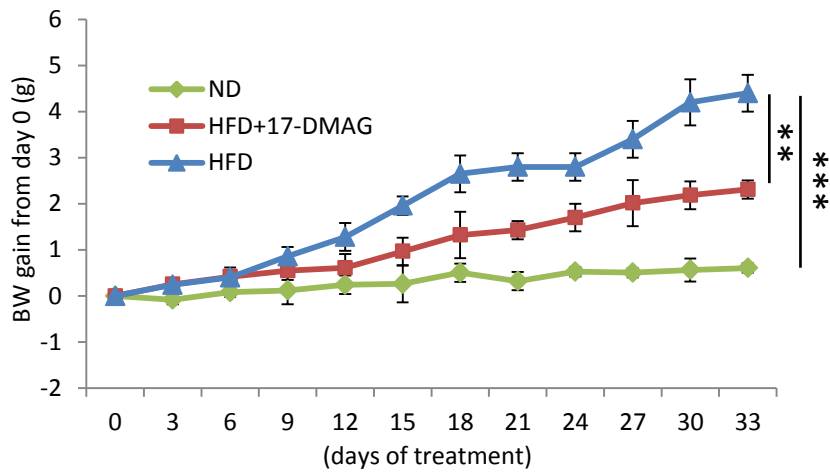

**17-DMAG limits high fat diet-induced body weight gain.** Two groups of mice HFD (n=7) and HFD+17-DMAG (n=8) were fed a HFD for 33 days and daily injected intraperitoneally with PBS or with 10mg/kg of BW 17-DMAG. One group as control ND (n=4) were fed a standard chow. The body weight was measured every 3 days.
