# Supplementary material for: Hsp90 Blockers Inhibit Adipocyte Differentiation and Fat Mass Accumulation
Source: PubMed Central journal article supplement (PMC3976389; doi:10.1371/journal.pone.0094127), 2014-04-04
Supplement: pone.0094127.s003.pdf [file pone.0094127.s003.pdf]

**Figure S3**

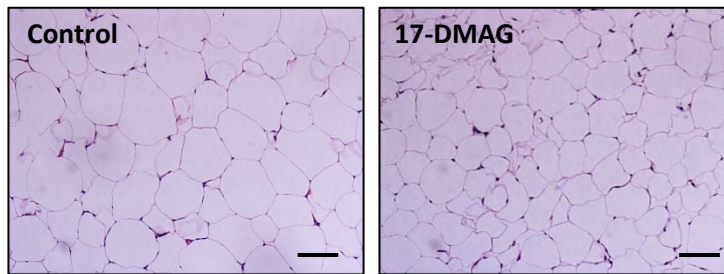

**17-DMAG prevents adipocyte hypertrophy.** Histological analysis of the inguinal adipose tissue fixed and stained with hematoxylin and eosin. Visualized under light microscope (X10). Scale bar = 200 $\mu$ m
