# Supplementary material for: Hsp90 Blockers Inhibit Adipocyte Differentiation and Fat Mass Accumulation
Source: PubMed Central journal article supplement (PMC3976389; doi:10.1371/journal.pone.0094127), 2014-04-04
Supplement: pone.0094127.s004.pdf [file pone.0094127.s004.pdf]

Figure S4

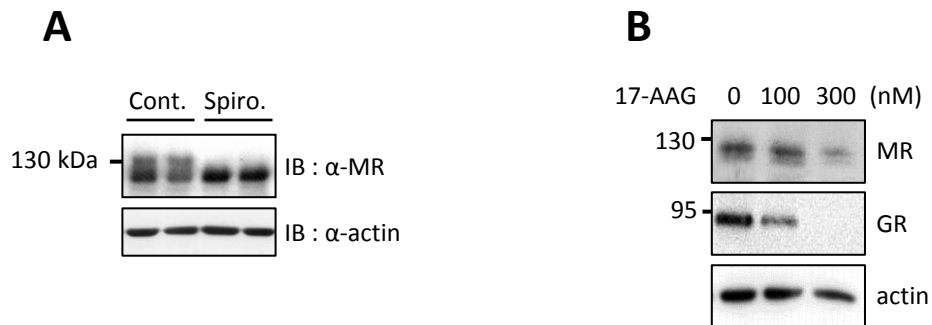

**Effects of blockers on adipocyte MR expression.** (A) 3T3-L1 preadipocytes were induced to differentiation with or without spironolactone ( $10^{-5}$  M) for 10 days. Cell lysates were analyzed by immunoblotting using antibodies against MR and actin as a loading control. (B) 3T3-L1 preadipocytes were induced to differentiation. At day 2 cells were treated with an increasing dose of 17-AAG for 24h. Cell lysates were analyzed by immunoblotting using antibodies against MR, GR and actin as a loading control.
