# Supplementary material for: Hsp90 Blockers Inhibit Adipocyte Differentiation and Fat Mass Accumulation
Source: PubMed Central journal article supplement (PMC3976389; doi:10.1371/journal.pone.0094127), 2014-04-04
Supplement: pone.0094127.s005.pdf [file pone.0094127.s005.pdf]

**Figure S5**

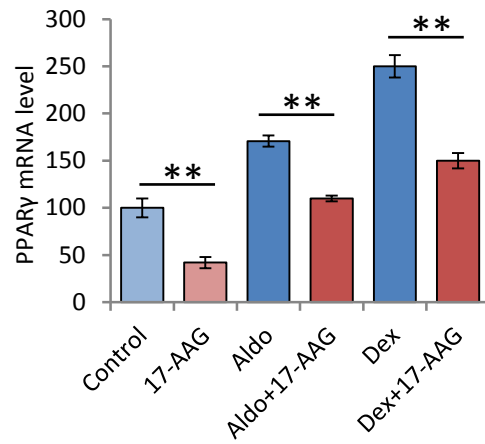

**17-AAG prevents steroid induction of PPAR $\gamma$ .** 3T3-L1 preadipocytes were induced to differentiation in presence or absence of 17-AAG (100 nM), aldosterone (10 nM) or dexamethasone (100 nM) for 10 days. The abundance of PPAR $\gamma$  mRNA was measured by quantitative RT-PCR. Given are means relative to GAPDH of 2 experiments performed in triplicate  $\pm$  SD, \*\* $p < 0.01$ .
