# Supplementary material for: Hsp90 Blockers Inhibit Adipocyte Differentiation and Fat Mass Accumulation
Source: PubMed Central journal article supplement (PMC3976389; doi:10.1371/journal.pone.0094127), 2014-04-04
Supplement: pone.0094127.s006.pdf [file pone.0094127.s006.pdf]

**Table S1**

| <b>Primers</b>    | <b>Sequences</b>              |
|-------------------|-------------------------------|
| PPAR $\gamma$ fwd | TTC ACA AGA GCT GAC CCA AT    |
| PPAR $\gamma$ rev | AAG CCT GAT GCT TTA TCC CC    |
| CEBP $\alpha$ fwd | GAC AAG AAC AGC AAC GAG TA    |
| CEBP $\alpha$ rev | AGC TGG CGG AAG ATG C         |
| Glut4 fwd         | ACACTGGTCCTAGCTGTATTCT        |
| Glut4 rev         | CCAGCCACGTTGCATTGTA           |
| LPL fwd           | GCTCTCAGATGCCCTACAAA          |
| LPL rev           | GATGTCCACCTCCGTGTAAA          |
| Adiponectin fwd   | TGC CGA AGA TGA CGT TAC TA    |
| Adiponectin rev   | TCT CAC CCT TAG GAC CAA GA    |
| VEGF fwd          | GTG GAC ATC TTC CAG GAG TAC C |
| VEGF rev          | TGC TGT AGG AAG CTC ATT CTC T |
| IGFBP3 fwd        | CAC GGA GCT GGT GCG           |
| IGFBP3 rev        | TGC TTA GGC TGC CTG C         |
| Rantes fwd        | CCT CAC CAT CAT CCT CAC TG    |
| Rantes rev        | CAC ACA CTT GGC GGT TC        |
| Resistin fwd      | AAC AAG ACT TCA ACT CCC TG    |
| Resistin rev      | TGT CCA GTC TAT CCT TGC AC    |
| HGF fwd           | GGT GTT TCA CAA GCA ATC CA    |
| HGF rev           | GCC CTT GTC GGG ATA TCT TT    |
| Lipocalin 2 fwd   | GTC GCT ACT GGA TCA GAA CA    |
| Lipocalin 2 rev   | CTT GGT TCT TCC ATA CAG GGT   |
| Leptin fwd        | CTG GCA GTC TAT CAA CAG GTC   |
| Leptin rev        | TCC ACC TCT GTG GAG TAG AG    |

Primer sequences used in the quantitative PCR experiments.
